# Supplementary material for: Identification of rock and fracture kinematics in high Alpine rockwalls under the influence of altitude
Source: Copernicus journal article supplement (doi:10.5194/esurf-2020-69), 2020-09-22
Supplement: Supplementary file 1 [file esurf-2020-69-supplement.zip]

*Supplement of*

## **Identification of rock and fracture kinematics in high Alpine rockwalls under the influence of altitude**

5

Daniel Draebing

*Correspondence to:* Daniel Draebing (d.draebing@uni-bayreuth.de)

### 10 **Data**

- Draebing et al.\_data.xlsx

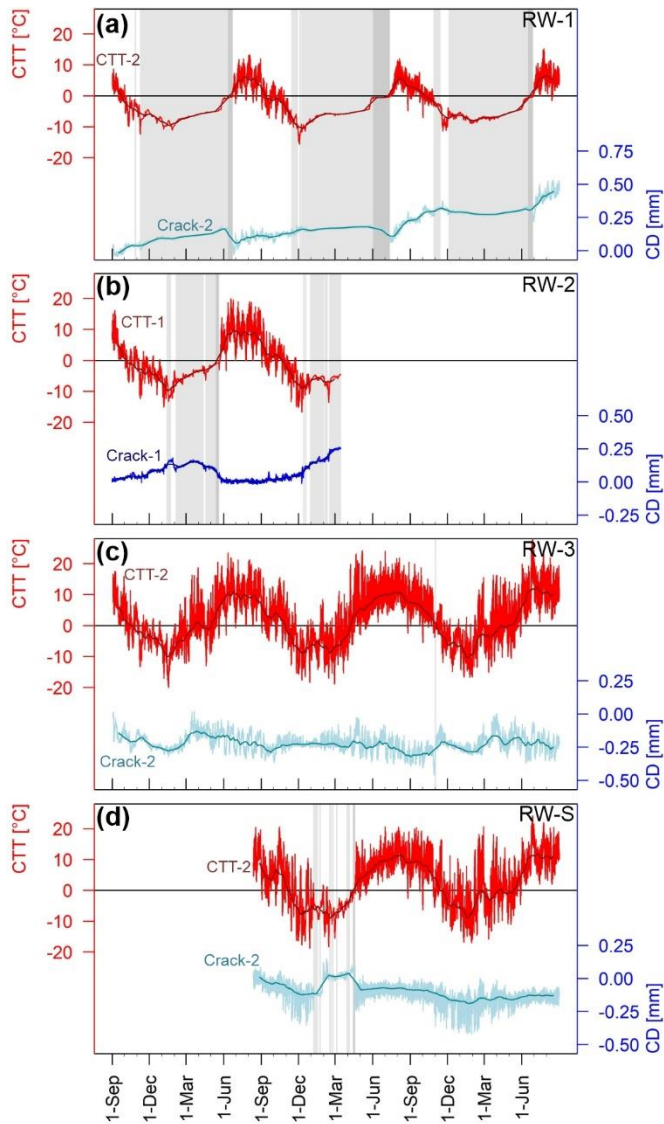

15 **Figure S1: Crack-top temperature, monthly mean crack-top temperature, crack deformation and monthly mean crack deformation for the crackmeters at (a) RW-1, (b) RW-2, (c) RW-3 and (d) RW-S. Light-grey rectangles indicate the snow cover period and dark grey rectangles the zero curtain period.**
